# Supplementary material for: A role for the poly-asparagine repeat in the Plasmodium histone acetyltransferase, PfGCN5
Source: Research Square preprint supplement (doi:10.21203/rs.3.rs-7490809/v1), 2025-09-04
Supplement: Supplementary file 1 [file bb3a4d713be1218e6238a086.docx]

**Supplemental material**

1,465 aa

PfGCN5

1134 1284 1373 1443

yGCN5

NNN

HAT

BrD

tGCN5

hGCN5L

hGCN5S

mGCN5

PCAF-h

TgGCN5-A

TgGCN5-B

**Length**

1,032 aa

1,186 aa

830 aa

837 aa

467 aa

439 aa

418 aa

69 174 292 375

124 226 347 360

93 246 335 405

86 336 503 656 745 815

81 331 496 649 738 808

850 996 1118 1166

631 784 901 971

143 240

**Supplemental figure 1. Conservation of functional domains in GCN5.** Comparative diagram of GCN5 homologs from *Tetrahymena thermophila* (tGCN5), *Saccharomyces cerevisiae* (yGCN5), *Homo sapiens* (hGCN5S: short isoform; hGCN5L: long isoform), *Mus musculus* (mGCN5), *Toxoplasma gondii* (TgGCN5A/B), and *Plasmodium falciparum* (PfGCN5). The P300/CBP-associated factor (PCAF)-homology domain is shown in orange, the histone acetyltransferase (HAT) domain in blue, the bromodomain (BrD) in green, and the poly-N repeat in pink. Numbers above each domain/motif indicate the start and the end of these regions according to data collected from UniProt using the PROSITE database. Not drawn to scale.


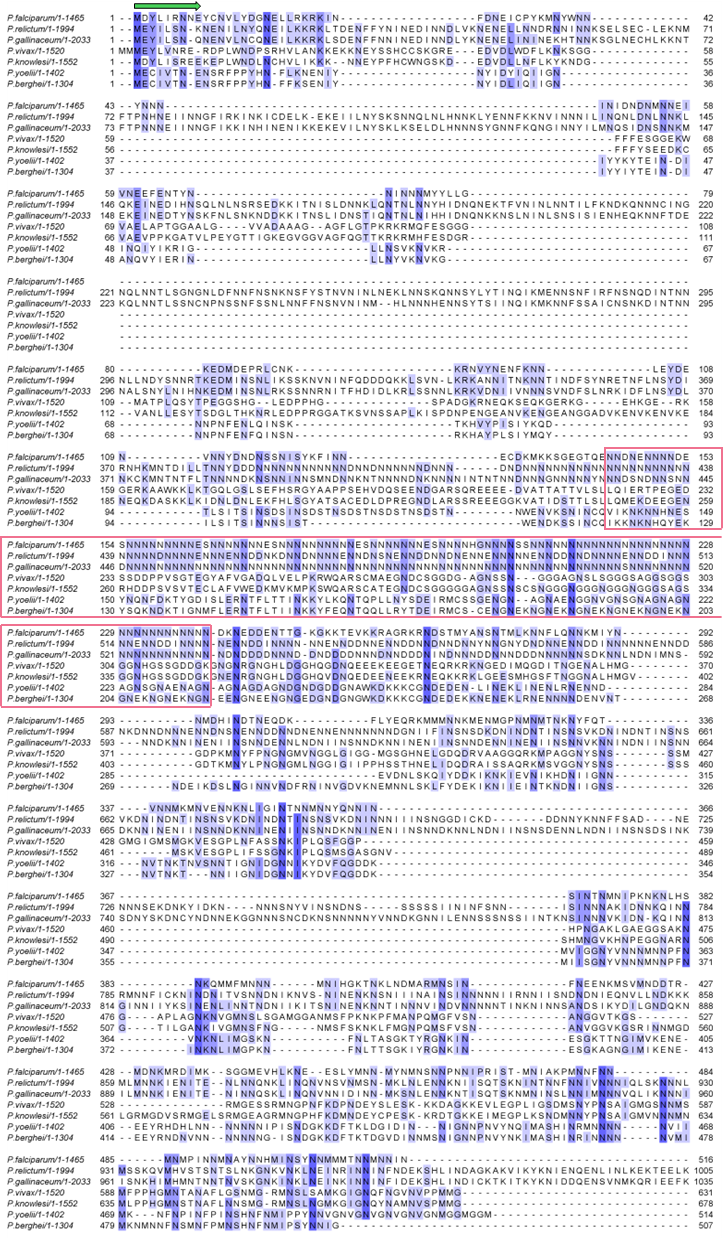


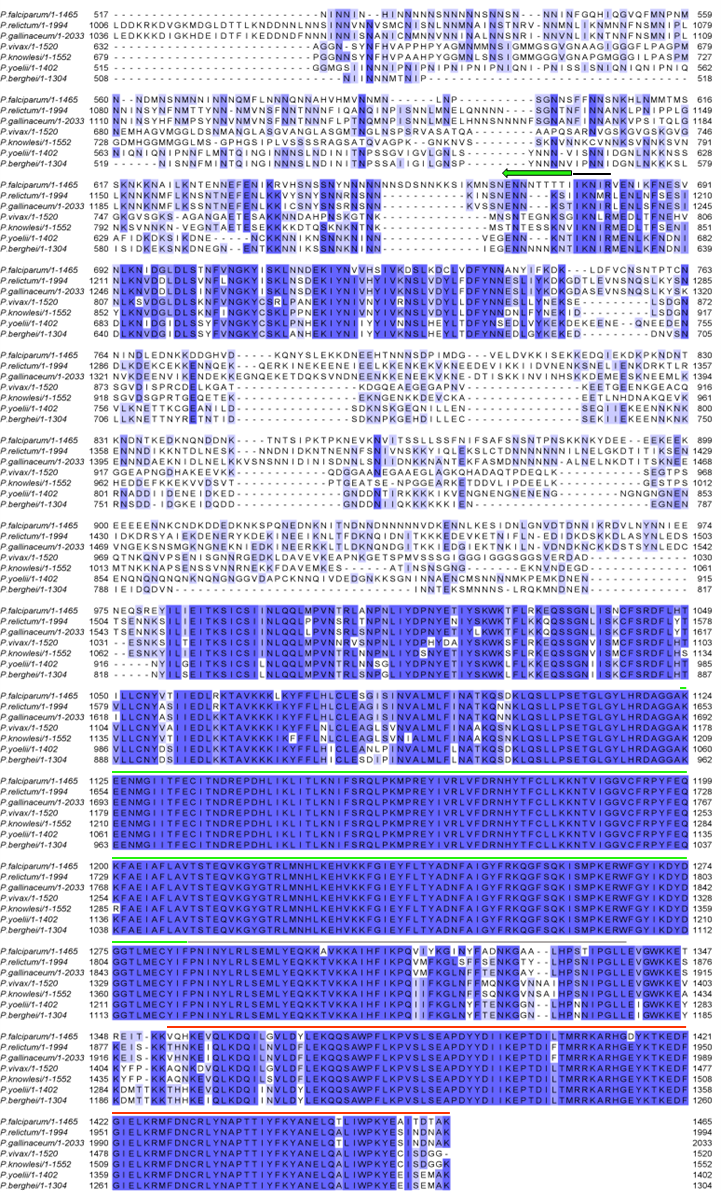


**Supplemental figure 2. Multiple sequence alignment analysis across plasmodial GCN5 homologs.** Alignment performedusing Clustal Omega and visualized in Jalview.The region flanked by the two green arrows depicts the PfGCN5 N terminus region used to make the PyGCN5 chimeric construct. Portion in pink box encompasses the N/GS-repeat. Black line highlights the conserved motif used to define the PfGCN5 N terminus in the chimeric construct. Green, gray, and red lines indicate the HAT, putative ADA2-binding, and BrD domains.


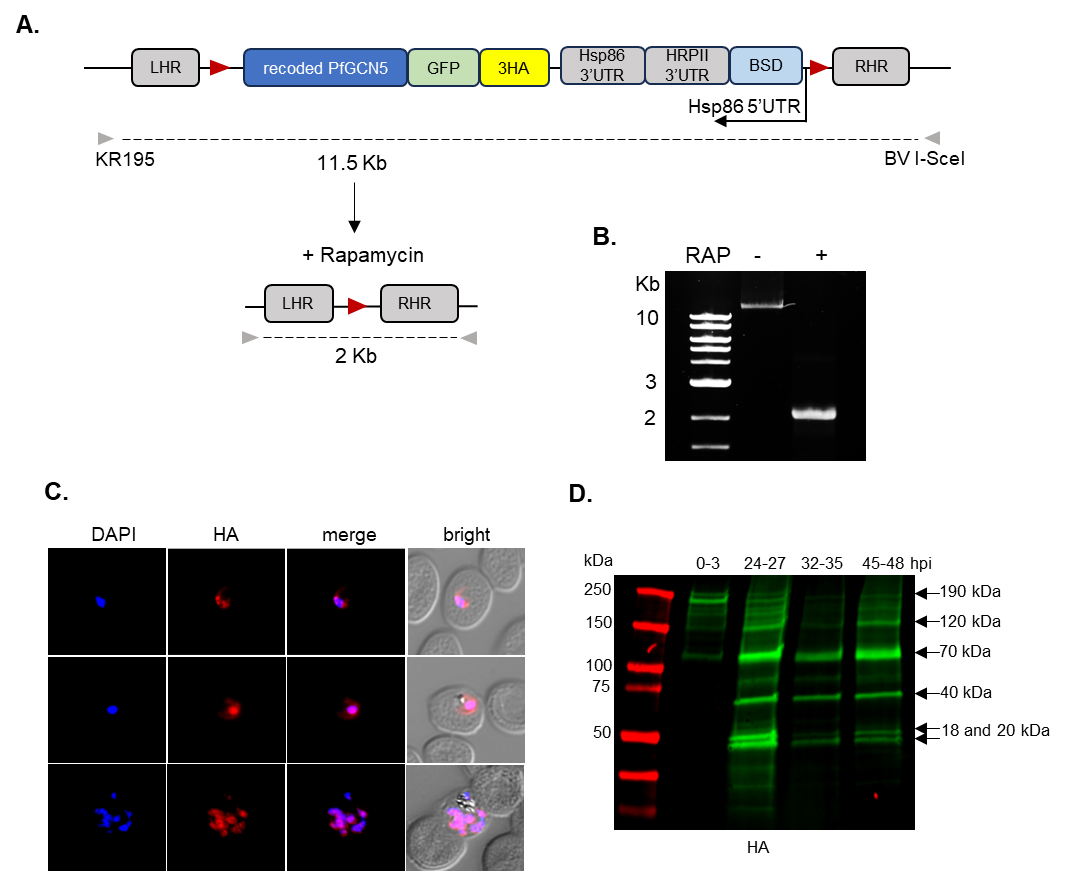


**Supplemental figure 3. Generation and characterization of the PfGCN5LoxP line.** **A)** edited *pfgcn5* locus showing LoxP sites (red triangles) and regulatory elements: the native promoter embedded in the left homologous region (LHR), Hsp86 3’UTR stabilizing the *pfgcn5* transcript, Hsp86 5’UTR driving the expression of the resistance cassette, blastocidin (BSD), and HRPII 3’ UTR stabilizing the *bsd* transcript. A *Saccharomyces cerevisiae* recoded PfGCN5 coding sequence was C-terminally tagged with GFP (light green) and 3xHA (yellow). Both the LHR and the right homologous region (RHR) were used for homologous recombination using CRISPR/Cas9. Gray arrowheads indicate primers KR195 and BV I-SceI used to check integration and rapamycin excision. **B)** Ethidium bromide-stained agarose gel showing excision of the entire *pfgcn5* locus 30 hours after adding RAP. Expected bands at 11.5 kb (-RAP) and 2 kb (+RAP) are observed **C)** Immunofluorescence analysis of PfGCN5 localization using anti-HA antibodies. DAPI stain was used for nuclear visualization. Shown is one biological replicate from three. **D)** Representative western blot from three biological replicates showing the processing of PfGCN5 throughout the intraerythrocytic cycle. Parasites were synchronized by magnet purification of late schizonts followed by sorbitol treatment 3 hours later. Arrows indicate the molecular mass after subtracting the mass of the GFP tag.


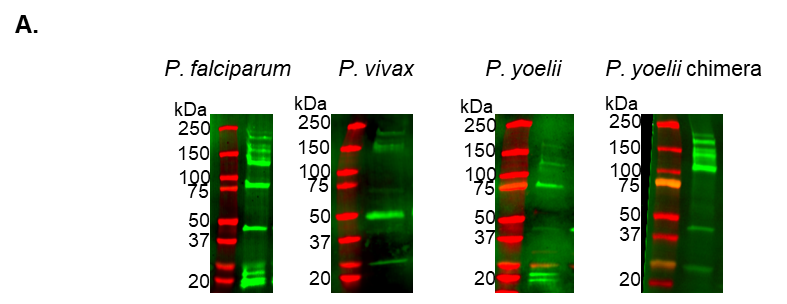


**Supplemental figure 4.** Identification of second copies (WT, homologs, and chimeric protein) in asynchronous rescue lines. FLAG-tagged GCN5 under the control of the native PfGCN5’s promoter was identified through western blot analysis using an anti-FLAG antibody.


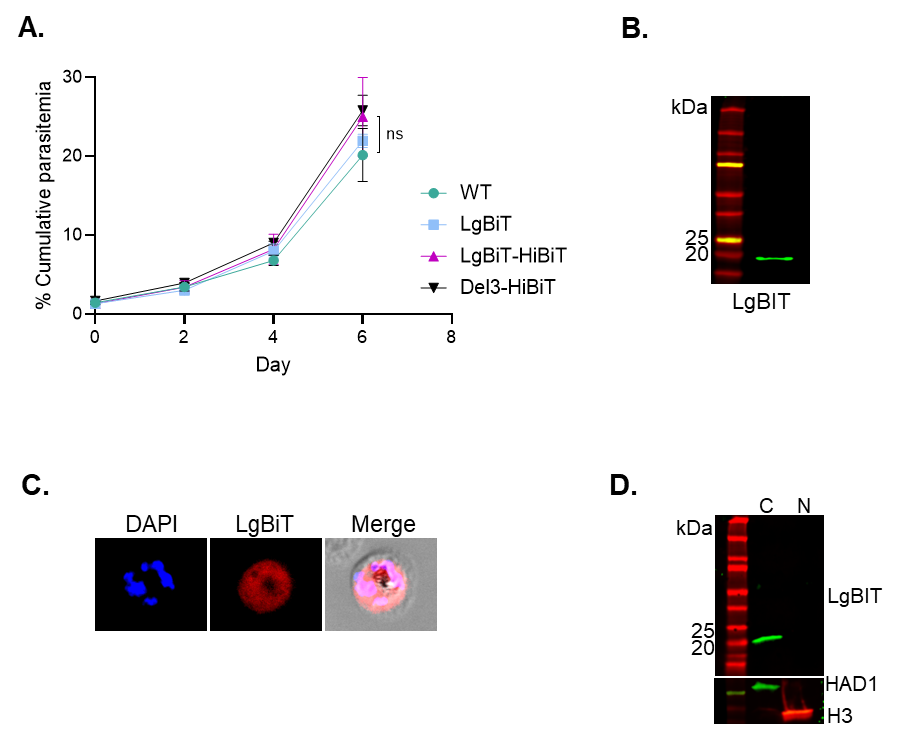


**Supplemental figure 5. Characterization of the LgBiT-HiBiT line.** **A)** Growth phenotype of LgBiT, LgBiT-HiBiT, and Del3-HiBiT lines assessed by flow cytometry every cycle for 6 days. Mean values from three independent experiments are shown, and error bars represent standard deviations. Data were analyzed statistically by a two-tailed Student’s test. **B)** Representative western blot showing the expression of LgBiT in the LgBiT line using an anti-LgBiT specific antibody. **C)** Inspection of the cellular localization of the LgBiT protein using immunofluorescence analysis. **D)** Cellular fractionation of the LgBiT-HiBiT line. LgBiT was identified using an anti-LgBiT antibody. Anti-HAD1 and anti-Histone 3 antibodies were used as markers of the cytosolic “C” or nuclear “N” fraction, respectively.


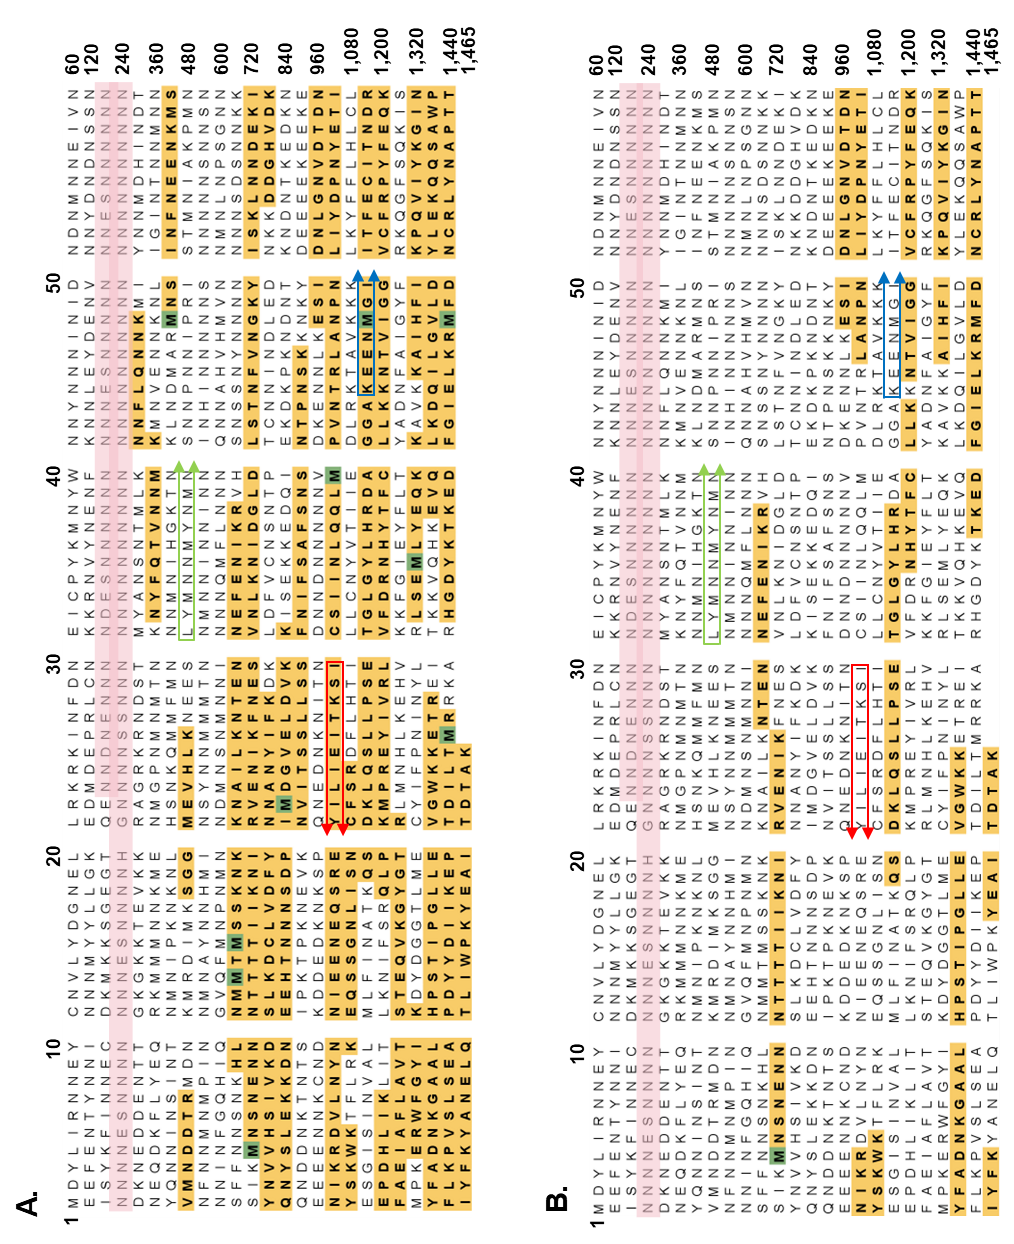


**1,200**

**1,465**

**1,080**

**10 20 30 40 50**

**60**

**120**

**360**

**1,320**

**480**

**600**

**720**

**840**

**960**

**240**

**1,440**


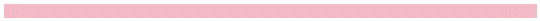

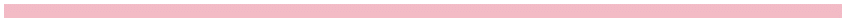


**1**

**
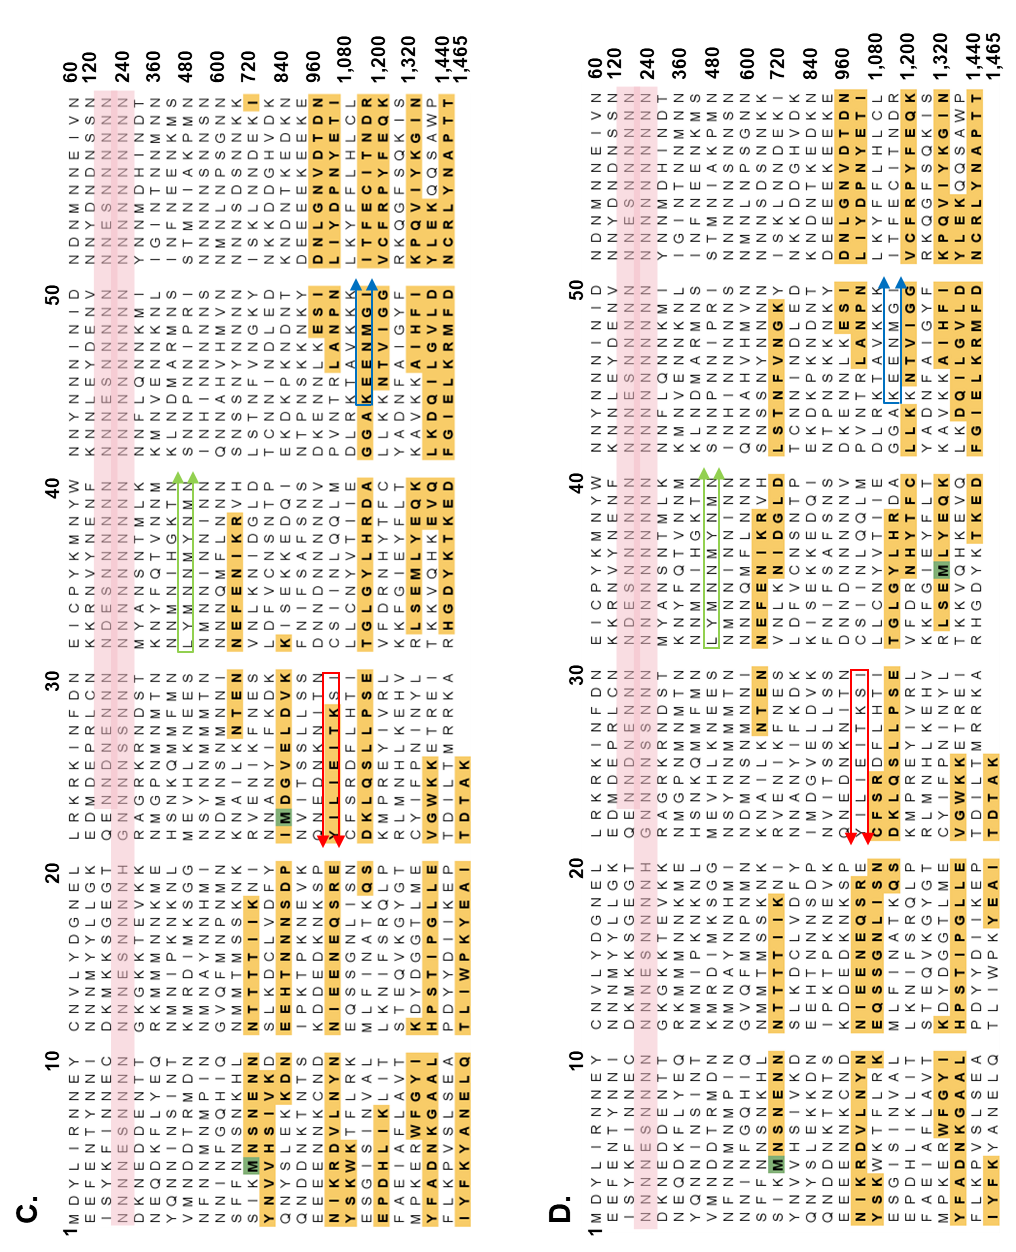
**

**Supplemental figure 6. Sequence coverage from C-terminal pull-downs in the A)** WT, **B)** Del1, **C)** Del2, and **D)** Del3 rescue lines. Peptides identified by mass spectrometry are shown in yellow, methionine residues susceptible to oxidation are shown in green, and the poly-N repeat is shown in light pink. The largest N-terminal polypeptide (~120 kDa) is predicted to end at the sequence enclosed with red arrows, and the largest C-terminal polypeptide (~120 kDa) is predicted to end at the sequence enclosed with green arrows. The predicted start site for the HAT domain is enclosed with blue arrows. Numbers indicate the amino acid position. Sequence coverage was visualized using the proteome software, Scaffold 5.

**Supplemental table 1. PfGCN5 C-terminal pull-downs couple with mass spectrometry.** Spectral counts were normalized to that of GCN5 for each line. Fold change corresponds to the ratio between the average of normalized values across the deletion lines over that of the WT rescue line. std: standard deviation. Values shown correspond to one biological replicate.

**Supplemental table 2. Primers used in this study**

| **Name** | **Sequence** |
| --- | --- |
| KR195 | CATGGAAAATTAAAAATATAACAATAACTTATTTTTAAACCTAGG |
| BV into I-SceI rev (BV I-SceI) | CGCGGCCGCTTACAACTGGACCTTGCTGG |
| KR24 GFP AsiSI In-fusion Fw | AGGTCCAGCGATGCGATCGCAGTAAAGGAGAAGAACTTTTCACTG  GAGTTG |
| KR25 GFP In-fusion Rv | ACGTCATAAGGGTAGGCCGATTTGTACAGTTCATCCATGCC  ATGTGTAATC |
| KR137 PfGCN5 recod Fw | GAACATCCGCCGCTCATGGATTATCTTATTCGAAATAACGAATACT  GCAACG |
| KR138 PfGCN5 recod Rv | AGTTCTTCTCCTTTACTGCGTCCTCCACTTCCGAGCGGTTTAGCAGT  ATCAGTAATAGCTTCATATTTTGGCC |
| KR135 PfGCN5 5'utr Fw | TCATTGACTGTGCCGGCCGGCAGTTTTCTAATAATATAAGATTTCAAG  AAGAAATGC |
| KR136 PfGCN5 5'utr Rv | GCTCCGGCAAATGACAAGGGACTTTTCTATTTCAATGATTTTTCACA  AGGAAAATATTTT |
| KR47 PfGCN5 RHR Fw | AGCTCGGATTACCCTGTTATGATCCAATTAATAATACACTCCTTTTTTA  TTTTTGGGAAAATAAAAAAGATGTATATATATTTTTTTATAT  TTGTATACCAGATAAGCATATCCTTTTATTATACAG |
| KR21 PfCGN5 RHR In-fusion Rv | GTATTAGACCTAGGGCATTAACAGTTCATATAAATGAAACATATTC  TTCAAACATTTG |
| KR104 GCN5 Pf 5'utr Infusion Fw | CGAAAAGTGCCACCTGACGTCGGAAAATTAAAAATATAA  CAATAACTTATTTTTAAACC |
| KR105 PfGCN5 5'utr Infusion Rv | ACGAGGTATTCCATCATCATGGCGCGCCACTTTTCTATTTCAA  TGATTTTTCACAAGGAAAATATTTT |
| KR333 PfGCN5 Del1 | GATGAAAGCAACAATAATAACAATAACAACAACAATGAG  AGCAACAATAACAACAACAATAATGAGTCAAATAACAAC  AATAACAATAACAACAATAACGAGTCTAACAACAACAAC  AACAACAATGAGAGTAACAATAATAATCACGGTAACAACA  ATAACGATAAGAATGAAGACGATGAGAATACGACTGGTAA  AGG |
| KR334 PfGCN5 Del2 | AAGATGAAAAAGTCTGGTGAGGGAACTCAAGAAAATAA  CGATAACGAAAACAACAACAACGATGAAAGCAACAATA  ATAACAATAACAACAACAATGAGAGCAACAATAACAAC  AACAATAATGATAAGAATGAAGACGATGAGAATACGAC  TGGTAAAGGTAAAAAAACTGAAGTGAAAAAAAGAGC |
| KR335 PfGCN5 Del3 | ATAAGATGAAAAAGTCTGGTGAGGGAACTCAAGAAAAT  AACGATAACGAAAACAACAACAACGATAAGAATGAAGA  CGATGAGAATACGACTGGTAAAGGTAAAAAAACTGAAGT  GAAAAAAAGAGCTGGTAGAAAAAGG |
| KR300 PfGCN5 N-hibit-N | TAACAACAATAATAATAACAATAATAATAACGTGAGCGG  CTGGCGGCTGTTCAAGAAGATTAGCAACAATGATAAGA  ATGAAGACGATGAGAATACGACTGGTAAAGG |
| KR256 LgBiT into yTEOE Fw | TCGAATAAACACGATTTTTTCTCGAGATGGTCTTCACACTC  GAAGATTTCG |
| KR258 Flag into yTEOE-LgBiT | TAAATATATTATATAACTCGACGCGGCCCCTAGGTCATTTATCAT  CATCATCTTTATAATCTTTATCATCATCATCTTTATAATCCTTGTCGTCGTCGTCCTTGTAGTCGCT  AGCACTGTTGATGGTTACTCGGAACAGC |
| KR60 PfGCN5 gRNA1 | TAAGTATATAATATTTTTTTTCTCTTTTTTCGTAAGTTTT  AGAGCTAGAA |
| KR61 PfGCN5 gRNA2 | TAAGTATATAATATTTTGTATACCAGATAAGCATAGTTTT  AGAGCTAGAA |
| KR139 PfGCN5 guide#3 Fw | TAAGTATATAATATTGTATTATCTTCTTGGAAAAGGTTTT  AGAGCTAGAA |
| KR140 PfGCN5 guide#3 Rv | TTCTAGCTCTAAAACCTTTTCCAAGAAGATAATACAATA  TTATATACTTA |
| KR141 PfGCN5 guide#4 Fw | TAAGTATATAATATTAAGATGATGAAAATACTACAGTTTT  AGAGCTAGAA |
| KR142 PfGCN5 guide#4 Rv | TTCTAGCTCTAAAACTGTAGTATTTTCATCATCTTAATATT  ATATACTTA |
| KR143 PfGCN5 guide#5 Fw | TAAGTATATAATATTTATTTGCACAGAGATGCGGGGTTTT  AGAGCTAGAA |
| KR144 PfGCN5 guide#5 Rv | TTCTAGCTCTAAAACCCCGCATCTCTGTGCAAATAAATA  TTATATACTTA |
